# Supplementary material
Source: Springer Nature journal article supplement (https://www.springermedizin.de/resource/supplementary/12885_2008_1441_MOESM1_ESM.pdf/9472020)

**TNF alpha  
(pg/ml)**

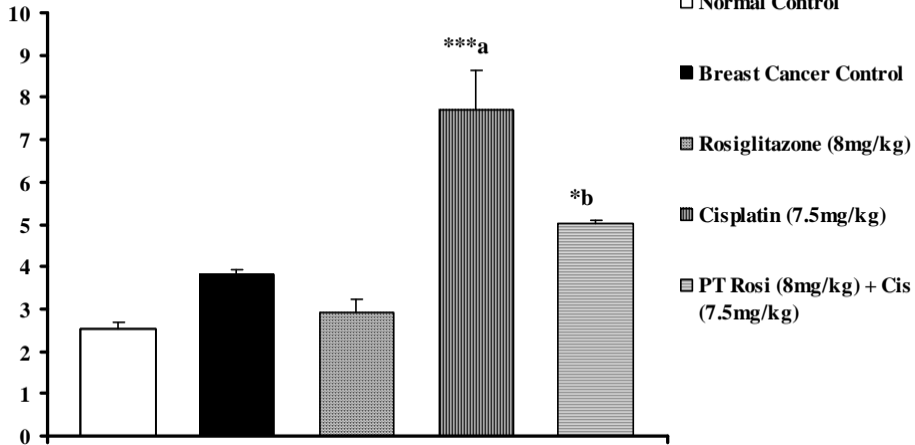

Supplement: MOESM1 [file 9472020]
